# Supplementary material for: Impact of the Oral Administration of Polystyrene Microplastics on Hepatic Lipid, Glucose, and Amino Acid Metabolism in C57BL/6Korl and C57BL/6-Lepem1hwl/Korl Mice
Source: MDPI journal article supplement (doi:10.3390/ijms25094964), 2024-05-02
Supplement: s1 [file s1]

Supplementary Table S1. Primer sequences for PCR and RT-qPCR analyses

| Primer name        | Sequence (from 5' to 3')            | Product size (bp) |
|--------------------|-------------------------------------|-------------------|
| Leptin             |                                     |                   |
| Forward            | TCC CAG GGA GGA AAA TGT GCT         | 219               |
| Reverse            | TGA CAT GTT TCT CAG ACT CTG GTT     |                   |
| PPAR $\gamma$      |                                     |                   |
| Forward            | GAG TTC ATG CTT GTG AAG GAT GCA AGG | 80                |
| Reverse            | CAT ACT CTG TGA TCT CTT GCA CG      |                   |
| C/EBP $\alpha$     |                                     |                   |
| Forward            | GTG GAC AAG AAC AGC AAC GAG TAC     | 71                |
| Reverse            | GGA ATC TCC TAG TCC TGG CTT GC      |                   |
| FAS                |                                     |                   |
| Forward            | GAT CCT GGA ACG AGA ACA CGA TCT GG  | 128               |
| Reverse            | AGA CTG TGG AAC ACG GTG GTG GAA CC  |                   |
| aP2                |                                     |                   |
| Forward            | GAA CCT GGA AGC TTG TCT CCA GTG GAT | 72                |
| Reverse            | GCT CTT CAC CTT CCT GTC GTC TGC     |                   |
| GLUT4              |                                     |                   |
| Forward            | GCT TTG TGG CCT TCT TTG AGA         | 67                |
| Reverse            | CTG AAG AGC TCT GCC ACA ATG         |                   |
| Insulin receptor   |                                     |                   |
| Forward            | AAT GGG ACC ACT GTA TGC ATC TT      | 84                |
| Reverse            | TCG TCC GGC ACG TAC ACA             |                   |
| PYGL               |                                     |                   |
| Forward            | CCA GAA TAA AAC CAA CGG GAT TA      | 88                |
| Reverse            | TCC AAT TTT CTC CGC TAT CAA GTC     |                   |
| Phosphoglucomutase |                                     |                   |
| Forward            | GGA GCT ACT CTC TGG TCC AAA CA      | 76                |
| Reverse            | CTT TAC GTA CGG TCC CAC AAC TC      |                   |
| G6PC3              |                                     |                   |
| Forward            | CCA GTT CCC TTC TTC TTG TGA GA      | 71                |
| Reverse            | GAG CTG CGC CTG TGA TCA             |                   |
| $\beta$ -actin     |                                     |                   |
| Forward            | TGG AAT CCT GTG GCA TCC ATG AAA C   | 349               |
| Reverse            | TAA AAC GCA GCT CAG TAA CAG TCC G   |                   |

Abbreviations: PPAR $\gamma$ ; peroxisome-proliferator activator receptor  $\gamma$ , C/EBP $\alpha$ ; CCAAT/enhancer binding protein  $\alpha$ , FAS; fatty acid synthase, aP2; adipocyte protein 2, GLUT4; Glu transporter type 4, PYGL; glycogen phosphorylase L, G6PC3; Glu-6-phosphatase catalytic subunit 3.

Supplementary Table S2. Definition of the NAFLD score

| Criteria                 | Definition                     | Score |
|--------------------------|--------------------------------|-------|
| Steatosis                |                                |       |
| Grade                    | < 5%                           | 0     |
|                          | 5% ~ 33%                       | 1     |
|                          | > 33%~66%                      | 2     |
|                          | > 66%                          | 3     |
| Location                 | Zone 3                         | 0     |
|                          | Zone 1                         | 1     |
|                          | Azonal                         | 2     |
|                          | Panacinar                      | 3     |
| Microvesicular steatosis | Absent                         | 0     |
|                          | Present                        | 1     |
| Inflammation             |                                |       |
| Lobular inflammation     | No foci                        | 0     |
|                          | < 2 foci per 200× field        | 1     |
|                          | 2-4 foci per 200× field        | 2     |
|                          | > 4 foci per 200× field        | 3     |
| Microgranulomas          | Absent                         | 0     |
|                          | Present                        | 1     |
| Large lipogranulomas     | Absent                         | 0     |
|                          | Present                        | 1     |
| Portal inflammation      | None to minimal                | 0     |
|                          | Greater than minimal           | 1     |
| Ballooning               | None                           | 0     |
|                          | Few ballooned cells            | 1     |
|                          | Many/prominent ballooned cells | 2     |

Abbreviation: NAFLD; Non-alcoholic fatty liver disease.

Supplementary Table S3. List of antibodies for Western blot assay

| <b>Antibody name</b>          | <b>Sequence (from 5' to 3')</b>                   | <b>Dilution ratio</b> |
|-------------------------------|---------------------------------------------------|-----------------------|
| anti-ATGL antibody            | Cell Signalling Technology Inc., Danvers, MA, USA | 1:1,000               |
| anti-HSL antibody             | Cell Signalling Technology Inc., Danvers, MA, USA | 1:1,000               |
| anti-p-HSL antibody           | Invitrogen, Carlsbad, CA, USA                     | 1:1,000               |
| anti-perilipin antibody       | Cell Signalling Technology Inc., Danvers, MA, USA | 1:1,000               |
| anti-p-perilipin antibody     | Cell Signalling Technology Inc., Danvers, MA, USA | 1:1,000               |
| anti-AMPK antibody            | Cell Signalling Technology Inc., Danvers, MA, USA | 1:1,000               |
| anti-p-AMPK antibody          | Cell Signalling Technology Inc., Danvers, MA, USA | 1:1,000               |
| anti-GLUT4 antibody           | Invitrogen, Carlsbad, CA, USA                     | 1:1,000               |
| anti-insulin receptor $\beta$ | Cell Signalling Technology Inc., Danvers, MA, USA | 1:1,000               |
| anti-IRS-1 antibody           | Cell Signalling Technology Inc., Danvers, MA, USA | 1:1,000               |
| anti-p-IRS-1 antibody         | Cell Signalling Technology Inc., Danvers, MA, USA | 1:1,000               |
| anti-PI3K antibody            | Cell Signalling Technology Inc., Danvers, MA, USA | 1:1,000               |
| anti-p-PI3K antibody          | Cell Signalling Technology Inc., Danvers, MA, USA | 1:1,000               |
| anti-Akt antibody             | Cell Signalling Technology Inc., Danvers, MA, USA | 1:1,000               |
| anti-p-Akt antibody           | Cell Signalling Technology Inc., Danvers, MA, USA | 1:1,000               |
| anti- $\beta$ -actin antibody | Cell Signalling Technology Inc., Danvers, MA, USA | 1:1,000               |

Abbreviations: ATGL; Adipose triglyceride lipase, HSL; hormone-sensitive lipase, AMPK; 5' AMP-activated protein kinase, GLUT4; Glu transporter type 4, IRS-1; insulin receptor substrate 1, PI3K; phosphatidylinositol 3-kinase, Akt; protein kinase B.
